# Supplementary material
Source: PubMed Central journal article supplement (PMC6487453)

# Mapping the Azolog Space Enables the Optical Control of New Biological Targets

Johannes Morstein<sup>†,§</sup>, Mahendra Awale<sup>‡,§</sup>, Jean-Louis Reymond<sup>‡,\*</sup>, Dirk Trauner<sup>†,\*</sup>

<sup>†</sup>Department of Chemistry, New York University, 100 Washington Square East, New York, NY 10003-6699, USA.

<sup>‡</sup>Department of Chemistry and Biochemistry, University of Bern, Freiestrasse 3, 3012 Bern, Switzerland.

<sup>§</sup>These authors contributed equally

## Supporting Information

### Table of Contents

|                                                                            |          |
|----------------------------------------------------------------------------|----------|
| <b>Analysis of linker-protein contacts .....</b>                           | <b>2</b> |
| <b>Correlation between similarity scatter plot and dihedral angle.....</b> | <b>3</b> |
| <b><sup>1</sup>H and <sup>13</sup>C NMR Spectra .....</b>                  | <b>4</b> |
| <b>Azo80 .....</b>                                                         | <b>4</b> |
| <b>LTH4 Photoswitch .....</b>                                              | <b>5</b> |

## Analysis of linker-protein contacts

For each of the four linker types (-CO-NH-, -CH<sub>2</sub>-NH-, -SO<sub>2</sub>NH- and -CH<sub>2</sub>-O-), 30 PDB entries were randomly selected and protein-ligand contacts were analyzed. For each selected PDB entry, the search was carried out on the "<https://www.rcsb.org/>" website and the "2D Diagram & Interactions" section was manually inspected to determine the protein-ligand interactions. Where the linker group has formed a H-bonding interaction with the protein, the corresponding PDB entry is marked as 1 in Table SI 1.

**Table SI 1.** Analysis of linker-protein contacts.

| PDB ID               | -CO-NH-   | PDB ID | -CH <sub>2</sub> -NH- | PDB ID | -SO <sub>2</sub> NH- | PDB ID | -CH <sub>2</sub> -O- |
|----------------------|-----------|--------|-----------------------|--------|----------------------|--------|----------------------|
| 3pyy                 | 1         | 4jhi   | 0                     | 2d41   | 0                    | 5j89   | 0                    |
| 4n9b                 | 1         | 5bwv   | 0                     | 2o4p   | 0                    | 4luz   | 0                    |
| 4krs                 | 1         | 4i13   | 0                     | 4cax   | 0                    | 4uga   | 0                    |
| 3aea                 | 1         | 2r3l   | 1                     | 2g0g   | 0                    | 3hr1   | 1                    |
| 2vtn                 | 1         | 3bmc   | 0                     | 4xv9   | 0                    | 4mse   | 0                    |
| 3vs0                 | 0         | 4yqq   | 1                     | 4yfn   | 0                    | 4kiu   | 0                    |
| 3dzu                 | 1         | 4p8m   | 0                     | 3hkc   | 0                    | 4jsh   | 0                    |
| 5t3q                 | 1         | 4qjo   | 0                     | 4nqm   | 0                    | 2r4b   | 0                    |
| 4qo9                 | 1         | 4x5f   | 0                     | 2ynd   | 0                    | 1u1f   | 0                    |
| 4bhn                 | 1         | 4kjj   | 0                     | 4wgi   | 0                    | 4y2t   | 0                    |
| 3pyh                 | 1         | 4cmf   | 0                     | 3tye   | 1                    | 3ad5   | 0                    |
| 4g9r                 | 1         | 4qrd   | 1                     | 4nqn   | 1                    | 4n4s   | 0                    |
| 4o91                 | 1         | 4gg5   | 0                     | 2hoc   | 0                    | 4nem   | 0                    |
| 1xm4                 | 0         | 4jev   | 0                     | 3qk0   | 0                    | 5adb   | 0                    |
| 5mvd                 | 0         | 4qre   | 1                     | 1fvv   | 1                    | 3u16   | 0                    |
| 4jts                 | 1         | 3h7w   | 1                     | 4jxh   | 1                    | 3h0a   | 0                    |
| 1dne                 | 1         | 3tyu   | 0                     | 4tu4   | 1                    | 3gnw   | 0                    |
| 4agw                 | 1         | 5bwu   | 0                     | 2obf   | 1                    | 5g6p   | 0                    |
| 1wm0                 | 0         | 3tr9   | 0                     | 5fg6   | 0                    | 3kzz   | 0                    |
| 4k0y                 | 0         | 1g2m   | 1                     | 4wmx   | 0                    | 5ufj   | 0                    |
| 3v6s                 | 0         | 5sy3   | 0                     | 2ea2   | 0                    | 3chp   | 0                    |
| 3ps6                 | 0         | 3et7   | 1                     | 3cdb   | 0                    | 4jsm   | 0                    |
| 2uym                 | 0         | 5h24   | 1                     | 4tpt   | 1                    | 4v26   | 0                    |
| 3cd7                 | 1         | 4yq6   | 1                     | 4xv2   | 1                    | 5i8b   | 0                    |
| 4rx5                 | 1         | 4pss   | 0                     | 5ar8   | 1                    | 4iae   | 1                    |
| 5t2p                 | 1         | 2dhf   | 0                     | 2xyx   | 0                    | 3ic2   | 0                    |
| 3r9h                 | 0         | 4ypw   | 1                     | 1uvt   | 0                    | 3ewj   | 0                    |
| 4kiq                 | 1         | 5sy2   | 1                     | 2fhy   | 1                    | 4zyc   | 0                    |
| 2vtt                 | 0         | 1kms   | 0                     | 4yad   | 0                    | 4dgg   | 0                    |
| 4gii                 | 0         | 4ky4   | 0                     | 4asp   | 1                    | 3fxv   | 0                    |
| <b>Total H-Bonds</b> | <b>19</b> |        | <b>11</b>             |        | <b>11</b>            |        | <b>2</b>             |

## Correlation between similarity scatter plot and dihedral angle

**Table SI 2.** Correlation between the position of each molecule in the similarity scatter plot (Figure 3/5) and the measured dihedral angle across the two-atom linker (Figure 2/4).

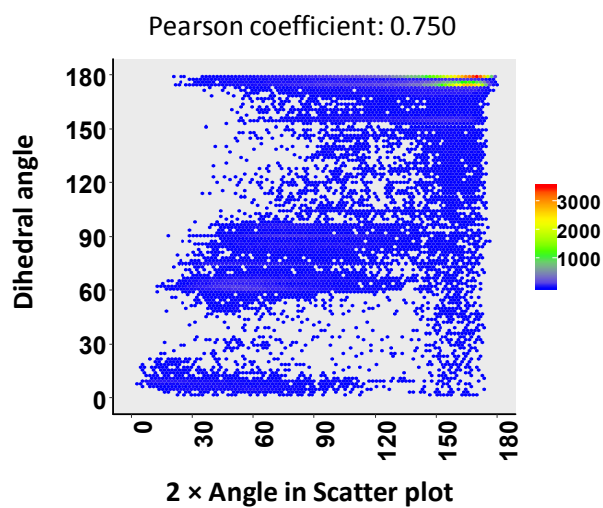

# $^1\text{H}$ and $^{13}\text{C}$ NMR Spectra

Azo80

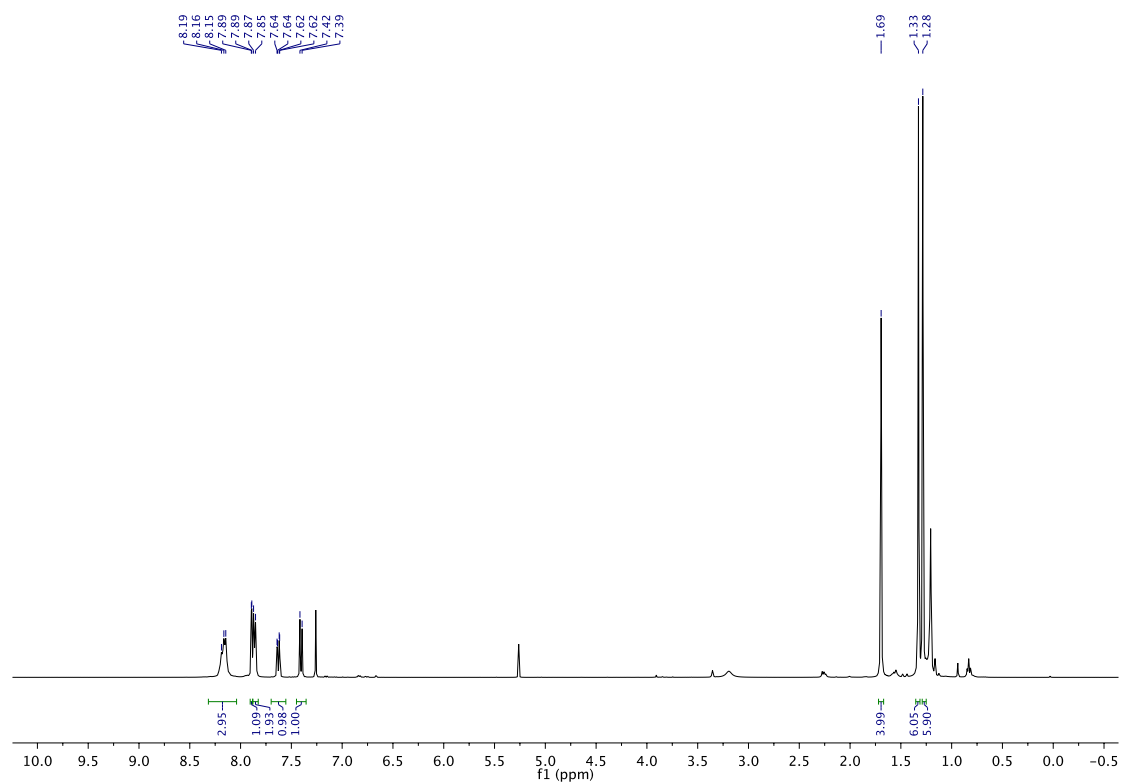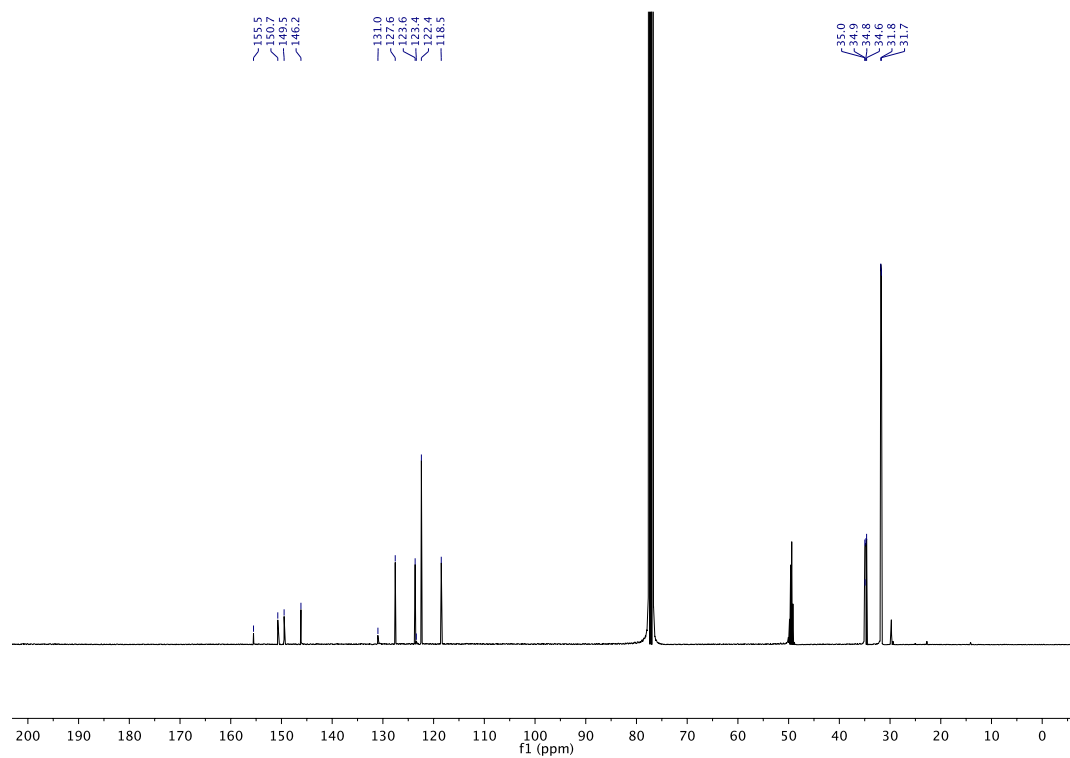

# LTH4 Photoswitch

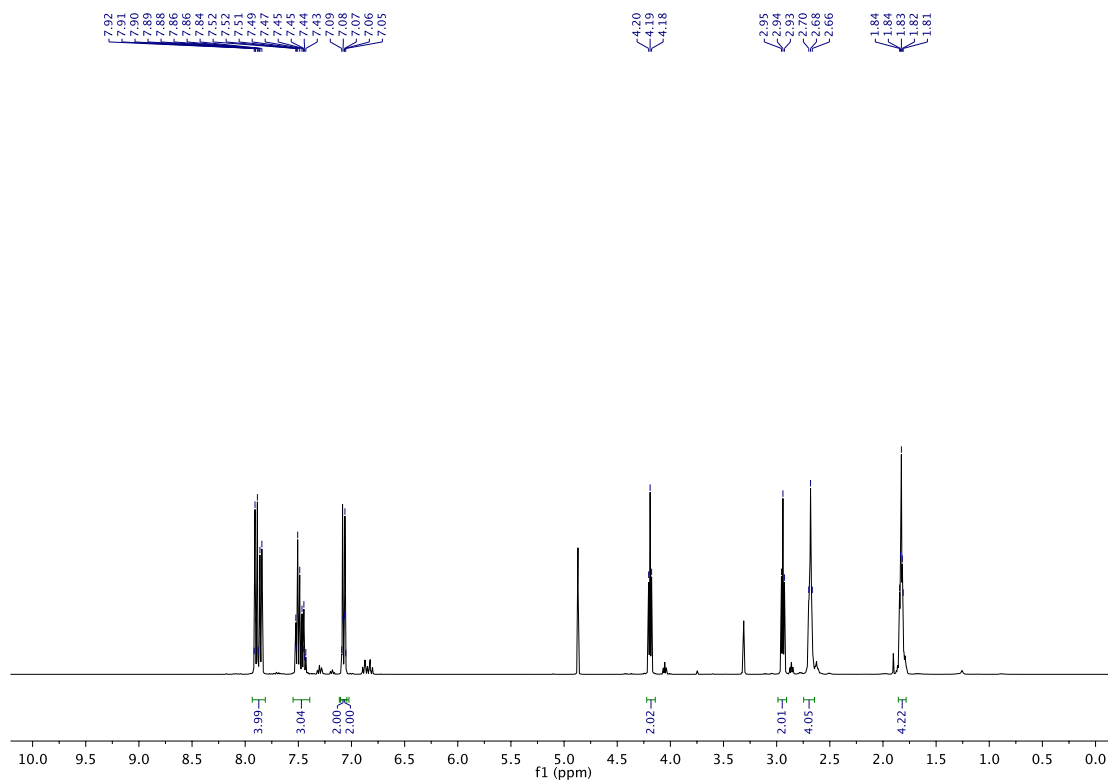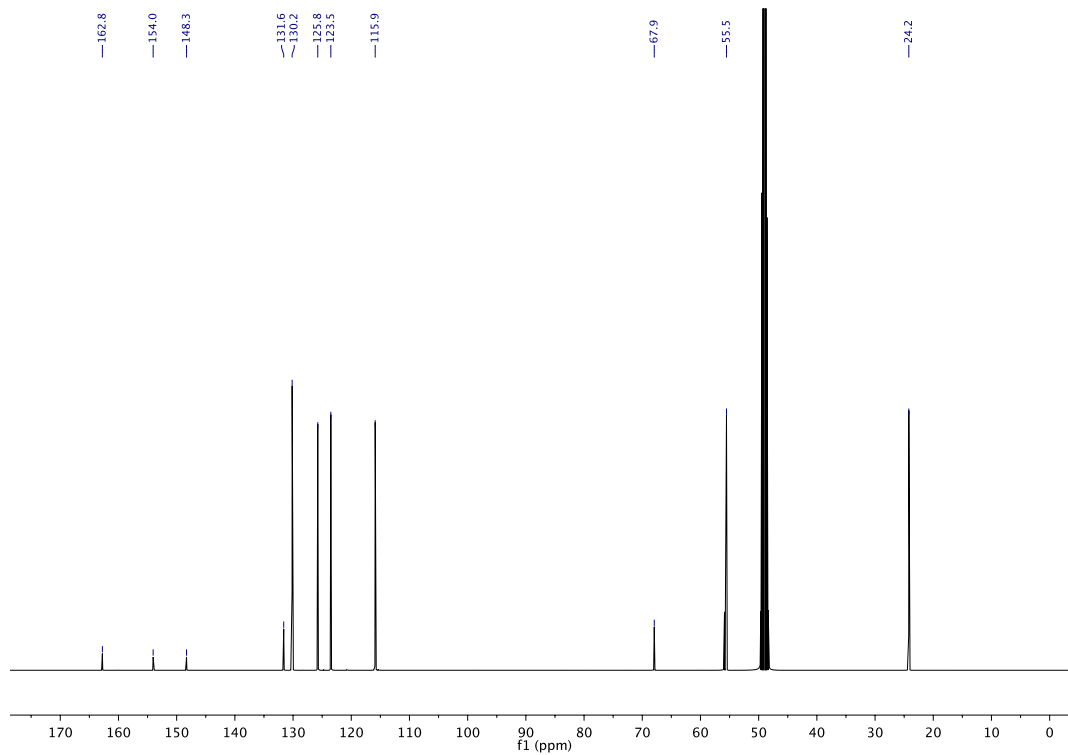

Supplement: oc8b00881_si_001.pdf [file oc8b00881_si_001.pdf]
